# Supplementary material for: Activation and Alliance of Regulatory Pathways in C. albicans during Mammalian Infection
Source: PubMed Central journal article supplement (PMC4333574; doi:10.1371/journal.pbio.1002076), 2015-02-18

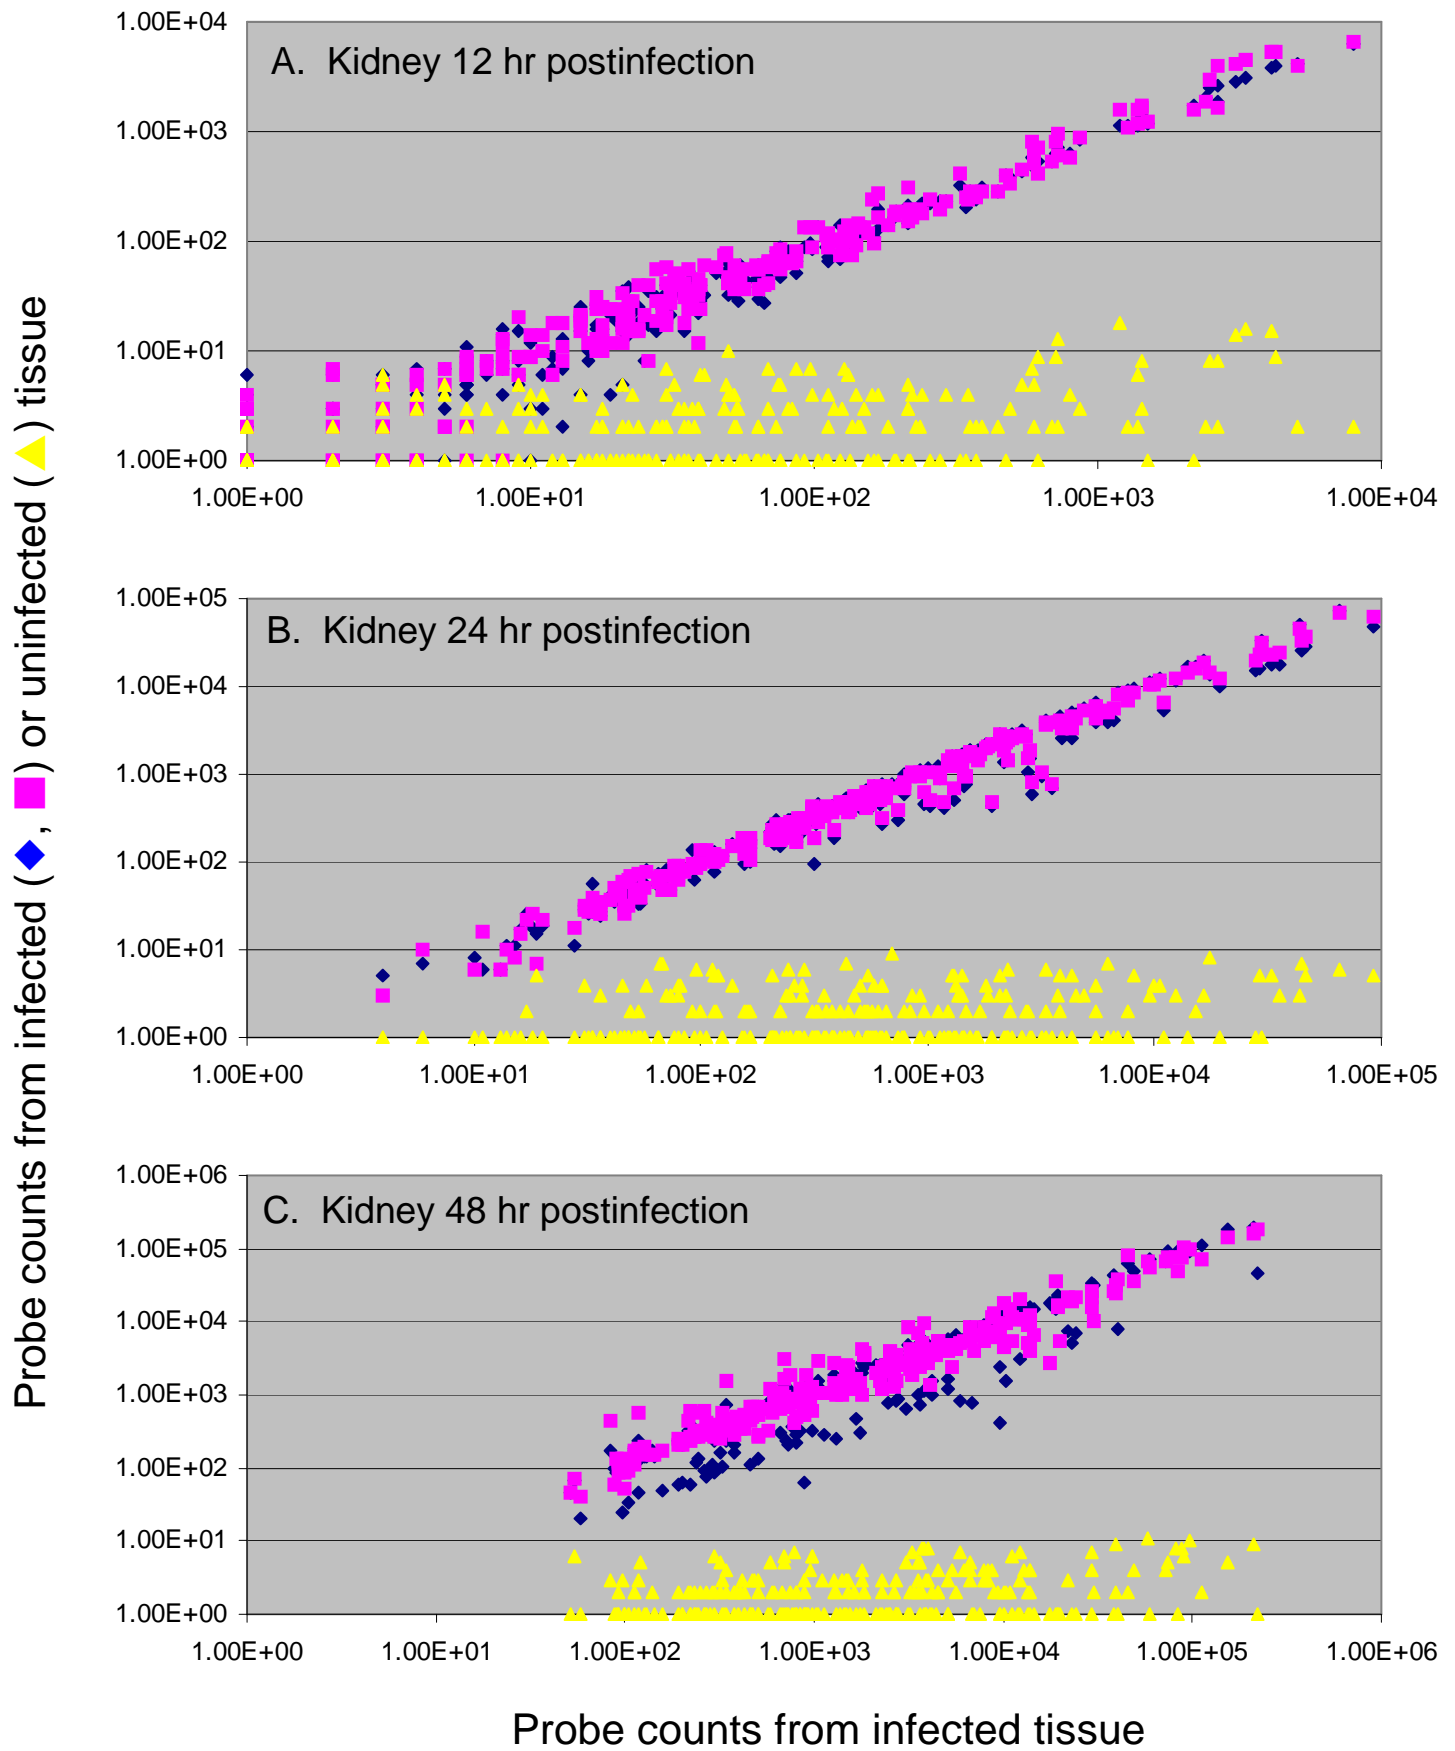

Supplement: pbio.1002076.s008.pdf [file pbio.1002076.s008.pdf]
